# Supplementary material for: Effects of Mindful Practices on Terror of Mortality: A Randomized Controlled Trial
Source: Mindfulness (N Y). 2022 Sep 5;13(12):3043–57. doi: 10.1007/s12671-022-01967-8 (PMC9441318; doi:10.1007/s12671-022-01967-8)
Supplement: Supplementary file 1 — Supplementary file1 (XLSX 28 KB) [file 12671_2022_1967_MOESM1_ESM.xlsx]

## Sheet: TNT_Data_Table
Age	Sex	Ethnic	Meditation_EX	Meditation_Time	Optinquestion1	Intervention	Observe1	Describe1	Act1	Nonjudge1	Nonreact1	FFMQ1	SCS_1	SelfDeath_1	OtherDeath1	SelfDying_1	OtherDying1	FDST_1	Observe2	Describe2	Act2	Nonjudge2	Nonreact2	FFMQ2	SCS_2	SelfDeath_2	OtherDeath2	SelfDying_2	OtherDying2	FDST_2	Observe3	Describe3	Act3	Nonjudge3	Nonreact3	FFMQ3	SCS_3	SelfDeath_3	OtherDeath3	SelfDying_3	OtherDying3	FDST_3
39	2	2	2	1	1	1	27	26	25	27	23	114	39	29	22	23	12	23	25	29	25	37	27	113	38	33	27	16	19	29	24	27	24	39	29	117	43	31	28	19	15	29
34	2	1	2	2	1	2	32	31	26	24	26	121	37	28	24	18	14	20	34	32	28	22	27	123	43	34	26	16	21	26	32	32	30	25	26	119	41	31	25	18	20	23
34	1	2	5	2	1	1	27	33	20	26	20	120	38	29	38	21	19	28	26	34	20	25	22	121	38	31	26	14	22	31	29	32	19	30	22	116	45	37	32	17	26	30
33	1	1	8	2	1	1	25	28	19	17	25	124	29	28	29	17	24	22	26	22	19	17	22	124	22	34	27	15	19	32	27	22	17	16	20	122	27	33	32	18	22	30
29	1	1	2	2	1	1	26	27	27	17	14	117	24	38	40	24	25	30	25	31	29	18	17	116	21	36	29	19	22	28	26	30	27	17	16	114	19	27	36	20	22	29
29	2	1	2	2	1	1	16	24	24	18	13	109	18	20	30	15	16	23	18	25	24	17	14	116	18	33	26	20	20	25	13	25	17	14	14	119	17	15	29	13	16	27
28	2	2	1	1	1	1	24	40	39	40	31	108	52	15	27	6	8	17
29	2	1	2	1	1	2	30	35	30	29	22	112	45	32	38	27	16	28	29	37	26	32	25	115	46	33	25	17	20	26	34	33	31	30	22	116	49	29	34	20	26	26
29	2	1	3	2	1	1	32	34	28	26	21	115	45	34	41	30	19	27	29	37	26	32	25	115	46	33	25	17	20	26	34	33	31	30	22	116	49	29	34	20	26	26
28	2	5	2	2	1	1	28	29	25	38	26	110	48	24	27	20	14	23	33	34	34	39	31	115	55	34	23	16	20	28	32	33	26	40	32	119	53	27	27	17	20	27
36	2	2	2	1	4		21	21	21	25	17	113	34	40	32	26	17	27
26	2	1	2	1	1	2	30	24	22	18	17	117	17	19	39	24	18	23	34	27	23	16	16	122	17	37	29	18	21	28	34	25	26	16	16	121	22	35	38	24	26	27
26	1	1	2	1	1	2	28	31	21	24	26	122	42	28	30	16	9	21	28	34	17	21	24	126	39	33	26	16	20	26	31	33	21	25	27	119	42	29	23	13	17	29
25	2	1	2	2	1	2	28	30	25	18	17	124	22	20	38	24	18	17	26	27	25	12	18	128	30	28	28	18	20	23	26	26	26	16	14	112	27	19	40	18	24	27
42	2	2	7	2	1		36	36	30	25	27	126	42	23	17	18	9	22	36	36	30	34	33	125	50	33	21	13	18	26	32	35	30	28	26	119	36	16	28	11	14	21
25	2	5	2	1	1	1	24	19	17	16	21	125	26	45	34	28	28	28
26	2	1	2	2	1	1	26	21	17	20	17	115	26	28	33	19	16	28
23	2	1	2	2	1	1	29	28	31	37	28	105	49	30	31	18	17	23	29	34	36	40	29	104	57	32	23	17	20	25	32	32	36	40	33	109	53	31	31	20	21	29
21	2	1	6	2	1	1	24	28	21	19	23	121	29	28	43	19	23	22	27	23	15	16	17	126	21	31	28	18	22	23	32	27	22	24	19	120	34	26	37	16	21	22
22	2	1	1		1	1	34	30	29	22	28	123	40	11	28	8	13	17													29	21	29	20	28	117	44	18	34	10	19	26
32	2	1	3	1	1	2	34	15	19	21	22	119	25	12	19	18	11	25
24	2	1	6	2	4		25	29	19	19	25	119	23	32	30	17	15	25	26	32	22	24	26	124	25	31	27	18	21	27	25	31	22	20	26	122	22	36	29	11	18	27
21	2	1	1		1	1	30	25	26	33	20	112	35	40	29	26	17	25
21	2	2	2	1	1	2	30	21	19	19	24	127	38	35	26	20	12	22
20	2	4	2	2	1	1	22	28	19	14	16	113	26	36	34	19	18	26													25	31	14	12	12	120	24	31	35	17	16	23
25	2	2	2	2	1	1	31	32	27	25	27	118	46	39	28	20	12	28	25	25	24	25	26	121	41	30	26	12	24	26	30	30	25	23	27	121	45	36	29	17	21	28
25	2	1	2	3	1	2	26	31	15	21	24	125	38	46	34	24	21	28
21	2	2	6	2	4		28	26	18	20	25	135	38	26	31	20	12	30	26	24	21	24	23	120	36	31	27	15	25	28	29	25	15	20	25	140	34	20	27	11	23	23
22	2	1	4	2	1	2	32	31	22	21	25	129	31	54	46	28	18	32	29	34	23	24	24	124	33	34	26	19	22	31	32	33	29	28	26	114	38	42	34	18	22	31
21	2	4	2	2	1	2	26	32	33	25	17	103	37	44	30	29	16	33	24	34	32	25	23	124	47	31	25	15	22	27	30	34	37	30	23	110	52	26	27	16	18	31
24	2	4	1	1	4		37	32	29	22	22	122	44	46	38	28	24	28	38	30	31	24	23	124	37	33	22	19	23	31	39	31	29	20	21	122	38	44	38	23	33	30
20	2	1	4	5	1	2	30	39	27	29	19	116	37	38	46	24	24	26	32	39	24	28	17	116	36	36	28	22	24	28	32	38	27	24	18	123	36	43	39	21	23	29
21	2	1	3	1	1	1	30	35	24	31	23	123	48	39	34	27	19	27	34	36	27	37	25	113	50	32	26	19	20	29	32	37	24	35	27	121	47	40	29	19	21	28
21	2	5	2	2	1	2	19	29	15	22	23	122	34	41	40	28	31	27	13	28	18	28	14	99	35	33	30	20	28	27	17	26	12	25	19	121	33	52	39	26	30	31
21	2	1	1	1	4		20	31	30	24	20	111	34	37	32	24	20	30	17	31	32	28	17	101	34	39	28	19	19	31	21	34	34	23	18	108	33	39	25	21	16	34
20	2	3	2	2	4		31	36	26	25	21	121	40	48	39	24	21	31													34	33	27	24	25	125	42	46	35	19	27	31
20	2	1	2	2	1	1	20	23	31	35	27	108	39	38	22	22	11	25	26	23	30	24	27	118	33	36	25	16	18	29	23	22	30	35	27	113	39	39	31	18	19	28
20	2	2	3	2	1	2	31	35	37	15	19	113	30	38	28	22	16	26	35	40	34	25	22	122	40	34	27	16	21	28	38	39	40	30	24	113	45	36	28	15	17	28
21	2	1	3	4	1	2	31	40	29	19	18	117	30	40	43	26	17	33
20	2	2	1	1	1		30	12	12	19	22	123	30	43	39	23	28	31	29	18	14	25	22	120	30	34	26	18	20	33	32	19	21	31	25	116	38	35	34	19	21	31
20	2	1	3	2	1	1	24	23	24	22	19	118	32	36	35	21	19	30	27	27	25	32	22	113	44	32	27	16	19	27
20	2	1	2	1	1	2	34	32	24	32	26	112	53	45	43	26	20	31	32	27	21	30	24	118	41	34	32	17	22	32	32	30	23	30	24	127	46	43	40	19	25	32
21	2	1	2	1	1	2	26	30	26	26	19	113	39	36	42	30	22	23
20	2	1	1	1	1	2	21	29	30	34	22	108	36	39	32	22	19	29	25	32	28	36	22	111	43	34	28	20	21	30	21	34	31	34	26	118	45	39	26	22	23	26
21	2	1	3	2	1	2	16	25	23	31	17	104	34	40	43	24	28	28	16	26	25	29	19	107	33	33	27	15	22	28	15	27	25	30	18	111	34	38	38	24	26	27
20	2	2	2	1	1	1	29	25	23	24	22	121	39	35	36	21	20	24
20	2	1	5	3	1	1	26	28	24	23	29	114	28	21	36	20	17	23	28	23	24	24	22	119	40	30	26	18	22	21	28	32	26	24	28	122	38	25	34	18	19	26
21	2	1	2	1	1	1	29	20	21	17	12	121	24	28	42	25	20	27	24	24	26	22	22	118	34	36	26	17	19	28	32	24	23	19	20	124	32	31	35	18	25	29
20	2	1	2	1	1	2	21	38	24	24	17	114	35	52	39	28	21	33	34	25	25	25	19	114	39	32	26	19	20	34	24	38	24	19	19	118	27	53	36	25	25	33
20	2	2	2	1	1	2	26	27	13	20	24	122	26	25	40	23	20	25
20	2	1	2	1	1	1	8	14	18	19	10	105	24	37	42	21	20	25	23	24	16	34	17	114	32	29	29	16	25	24
21	2	2	7	2	1	2	40	29	22	21	24	128	29	15	33	10	15	18	40	22	26	19	24	125	24	24	30	16	19	17	40	24	22	19	27	138	28	13	29	13	15	23
20	1	1	1	1	1	2	36	27	29	19	16	115	33	44	31	27	18	28	34	26	25	19	20	116	36	36	24	14	24	31	38	26	24	17	19	122	40	44	32	20	23	29
20	2	1	2	1	1	1	35	30	16	29	19	115	26	53	40	31	19	31	35	29	17	28	16	111	25	41	28	20	20	31	36	32	15	29	20	122	28	51	38	23	22	30
21	2	1	2	1	1	1	27	18	19	23	23	126	38	47	37	31	24	28	26	15	19	26	23	117	30	31	27	19	21	28	24	15	17	18	23	123	34	45	35	25	23	29
21	2	1	1	1	1	1	31	40	23	20	20	120	24	48	36	26	16	26	29	40	31	23	22	119	37	38	23	16	21	30	36	40	31	28	25	114	47	41	35	21	23	28
33	2	5	2	2	1	2	35	30	27	25	16	115	37	29	35	24	9	30
33	2	4	5	4	1	1	37	34	18	19	23	133	39	21	26	13	15	22	38	39	26	27	22	120	50	26	23	14	18	22	29	39	22	25	21	122	33	14	19	15	16	20
30	2	1	2	2	1	2	17	32	24	17	15	115	15	43	35	16	10	32	25	32	27	25	21	116	35	32	27	14	19	31	24	38	27	30	21	114	33	39	32	13	7	22
20	1	2	2	1	1	2	15	32	27	31	24	107	30	33	36	24	22	20	16	26	24	30	22	106	30	30	25	18	21	28	25	30	25	31	23	112	43	34	28	19	23	27
32	2	1	2	1	4		23	32	26	30	26	117	44	31	40	19	14	32	25	32	26	30	25	114	38	35	28	18	22	27	23	32	26	31	21	113	39	37	36	17	16	28
21	1	1	2	3	1	2	22	34	26	27	28	123	46	49	19	21	12	29	29	32	27	29	29	124	47	38	22	15	18	30	19	39	28	31	33	118	53	42	22	18	13	34
38	2	2	5	4	1		33	36	24	30	17	118	33	33	32	18	12	21	31	36	23	35	20	115	26	33	27	16	21	27
38	2	2	5	3	4		30	39	23	32	18	116	26	30	33	16	17	24
28	1	1	4	3	1	2	32	39	30	31	27	117	47	16	20	24	17	17
21	1	3	2	3	1	2	25	30	25	28	26	120	33	25	28	20	20	18	24	31	25	21	28	119	33	33	27	15	24	25	23	32	29	16	31	121	33	14	27	13	19	19
20	1	1	2	2	1	2	33	38	23	25	19	120	31	50	41	28	26	31	34	39	26	25	18	120	33	39	27	19	23	31	37	39	25	25	18	122	32	52	35	21	20	30
26	2	1	2	2	1	2	32	33	19	23	24	121	36	42	30	25	10	16	35	35	25	29	24	122	44	34	27	17	18	25	35	38	25	30	26	124	51	29	27	22	23	19
31	1	1	7	5	1	1	31	32	25	32	25	117	52	12	20	9	10	13	33	32	30	35	25	111	52	29	23	15	21	20	34	35	32	40	27	112	55	10	16	14	13	18
22	2	4	2	1	1	2	21	27	26	26	19	109	32	42	47	26	25	28	29	26	31	24	20	118	39	31	29	15	19	29	33	28	28	28	18	115	42	35	34	21	24	25
30	2	1	5	4	1	1	35	20	20	22	22	127	51	25	27	29	19	24
22	2	1	3	2	1	2	22	26	20	17	16	117	29	44	40	26	25	28	25	32	17	16	18	126	25	35	28	18	22	30	22	31	23	16	14	116	28	44	39	21	26	32
23	2	4	1	1	1	2	31	25	24	16	22	124	29	33	31	24	26	28	31	28	23	20	22	126	38	28	29	18	24	28	29	25	22	17	20	125	34	33	33	21	25	28
22	1	4	2	2	1	1	28	31	29	20	22	116	41	33	34	24	26	25	24	27	28	20	21	118	46	35	25	17	24	29	28	28	26	23	22	119	41	33	32	23	28	26
22	1	2	2	1	1	2	23	26	29	30	19	99	27	46	29	18	15	36	25	29	36	29	15	100	25	36	25	17	21	29
25	2	1	2	4	1	2	30	36	28	26	16	112	46	40	30	22	15	20	34	40	32	32	20	114	55	33	26	20	24	23	38	37	34	34	26	119	53	30	21	17	22	26
19	1	1	4	2	4		31	40	31	30	27	121	48	41	36	26	12	32	32	39	32	32	28	121	50	32	27	18	22	29	36	40	32	33	27	120	53	38	37	20	17	27
23	2	1	2	2	1	2	28	36	21	19	18	120	32	30	36	24	14	18													34	36	30	30	22	112	47	29	34	16	30	20
20	2	1	2	1	1	1	29	17	11	10	15	124	24	39	44	23	23	24	31	15	18	13	16	119	20	37	28	18	22	26
28	2	1	1	1	1	1	32	23	33	40	27	113	50	44	30	29	18	27	28	20	31	32	27	112	42	33	24	19	21	30	31	22	32	40	26	111	43	43	25	22	19	28
29	2	1	3	3	1	1	31	32	22	31	26	122	48	44	39	26	18	32	32	32	23	38	28	117	50	33	27	18	19	30	32	37	25	39	28	115	56	37	36	19	18	28
26	2	1	2	1	1	2	31	35	27	40	28	113	25	21	21	22	17	23	35	38	21	39	29	122	33	29	20	17	22	24	33	38	24	40	29	116	28	14	18	17	15	27
47	2	1	2	2	1	1	34	28	15	35	20	112	40	48	42	28	17	32	40	25	10	34	21	120	39	40	27	18	21	27	36	29	13	35	22	115	41	47	27	23	20	26
22	1	4	2	1	1	1	29	22	18	19	16	120	32	33	32	23	25	24	22	23	21	19	24	123	35	33	25	20	20	27
25	2	1	1	1	1	2	32	30	28	29	28	115	49	24	31	16	15	28	27	26	30	37	28	114	44	32	27	20	22	28	30	26	32	33	28	113	49	25	27	16	28	32
38	2	5	4	2	1	2	33	33	25	35	22	110	38	39	28	27	18	24	31	35	29	37	23	109	40	35	24	17	21	27	35	36	31	40	28	114	49	33	27	16	25	23
37	1	1	3	1	1	1	25	32	20	24	17	116	29	26	30	23	21	28	26	30	22	24	21	117	36	36	26	14	23	25	24	30	23	23	21	115	33	30	30	23	27	30
25	2	2	3	2	1	2	34	31	28	26	17	120	40	25	31	23	19	21	34	34	31	30	25	120	53	32	24	17	19	23	37	38	32	36	27	120	54	15	27	14	17	27
35	2	1	2	5	1	1	28	28	26	15	14	113	33	33	31	23	17	25	22	30	28	24	16	102	29	31	27	16	25	27	23	30	25	19	16	109	28	30	29	15	18	25
24	2	1	2	3	1	2	16	28	27	37	26	110	41	20	21	13	15	21	23	30	25	31	28	119	40	33	26	18	24	27	19	33	23	37	28	116	44	22	21	8	14	25
43	2	1	8	2	1	2	37	35	33	29	27	119	52	23	22	29	7	21	37	33	29	28	27	122	50	30	26	13	20	30	36	36	31	31	27	117	51	30	28	15	17	27
26	2	1	2	2	1	1	23	25	27	29	21	109	31	27	28	22	13	20	27	27	30	30	21	107	47	33	28	15	19	28	31	26	32	31	21	111	48	27	30	17	15	30
38	1	1	6	2	1	1	27	32	24	36	28	115	52	26	42	25	16	22	27	29	21	30	29	112	55	34	27	15	20	25	25	33	24	32	28	110	55	30	39	19	21	26
31	2	5	1	1	1	1	16	9	10	23	9	111	21	54	41	25	24	32	25	19	24	37	25	112	28	42	28	19	20	30
21	2	1	2	2	4		20	32	21	30	22	111	40	30	31	21	15	23	20	33	23	25	24	119	33	37	26	18	20	29	20	33	20	26	22	119	42	37	33	18	22	31
38	2	1	4	1	1	1	32	33	25	30	26	120	46	39	39	19	11	27	35	37	29	33	29	117	47	33	29	16	21	27	33	38	27	36	28	116	47	38	35	15	17	28
29	2	2	3	6	1	2	36	30	31	25	26	120	34	20	33	8	12	23
51	2	1	2	1	1	2	24	24	24	24	21	117	38	29	32	28	21	23	32	32	32	32	28	118	46	32	23	15	25	26	32	32	32	32	28	118	46	20	27	19	21	27
20	2	5	1	1	1	1	19	11	22	17	15	108	18	35	41	28	27	23	14	20	28	25	19	106	30	36	28	18	23	32	13	24	29	27	21	102	37	54	40	25	28	35
40	2	1	7	3	1	2	34	34	31	36	33	116	54	33	33	19	11	26																						14
29	2	5	1	1	1	1	24	31	23	28	17	109	36	20	31	25	15	25																						14
49	2	1	2	2	1	1	30	32	32	24	21	115	39	30	30	26	15	24																						14
54	2	4	7	3	1		35	33	32	33	28	119	52	19	26	16	14	21	39	40	34	39	28	118	57	25	27	16	21	30										14
